# Supplementary material for: Synthesis of novel isophorone-based dyes for dye-sensitized solar cells
Source: Royal Society of Chemistry journal article supplement (doi:10.1039/c5ra17898c), 2015-01-01
Supplement: c5ra17898c1.pdf [file c5ra17898c1.pdf]

## *Supplementary data*

# **Synthesis of Novel Isophorone-based Dyes for Dye-sensitized Solar Cells**

Yih-Chun Chen, Yan-Zuo Lin, Yu-Ting Cheng, and Yuan Jay Chang\*

*Department of Chemistry, Tung Hai University, Taichung 40704, Taiwan*

### Contents

|                                                  |       |
|--------------------------------------------------|-------|
| 1. Experimental                                  | 2-4   |
| 2. $^1\text{H}$ and $^{13}\text{C}$ NMR spectra  | 5-17  |
| 3. UV/Vis spectra                                | 18    |
| 4. Theoretical calculation                       | 18-19 |
| 5. CV spectra                                    | 20    |
| 6. Different solvent system in DSSCs performance | 20    |
| 7. Dye loading amount with/without DCA           | 21    |

\* Corresponding author. Tel.: +886-4-23590121 ext 32224; fax: +886-4-23590426;  
E-mail: jaychang@thu.edu.tw

## 1. Experimental

**Ethyl (*E,Z*)-2-cyano-2-(3,5,5-trimethylcyclohex-2-en-1-ylidene)acetate (B).** Isophorone **A** (2.0 g, 14.47 mmol), ethyl cyanoacetate (1.54 mL, 14.47 mmol), ammonium acetate (579 mg, 7.06 mmol), acetic acid (1.2 mL), and benzene (20 mL) were mixed in a three-necked flask under N<sub>2</sub> and heated to reflux by using the Dean–Stark apparatus. After 12 h, the mixture was extracted using ethyl acetate. The organic layer was dried over anhydrous MgSO<sub>4</sub> and evaporated under vacuum, and the crude product was purified through vacuum distillation. An 80% yield of a yellow liquid **B** (*Z*-:*E*- = 1:1) (2.69 g, 11.57 mmol) was obtained.  $\delta_{\text{H}}$  (300 MHz, CDCl<sub>3</sub>) 7.41 (s, 0.5H), 6.43 (s, 0.5H), 4.01–4.08 (m, 2H), 2.69 (s, 1H), 2.33 (s, 1H), 1.95 (s, 1H), 1.93 (s, 1H), 1.80 (s, 1.5H), 1.78 (s, 1.5H), 1.14 (t, 3H, *J* = 7.08 Hz), 0.80 (s, 3H), 0.78 (s, 3H).  $\delta_{\text{C}}$  (75 MHz, CDCl<sub>3</sub>) 166.3, 165.0, 162.1, 161.5, 156.4, 155.9, 121.9, 119.7, 116.0, 115.3, 98.1, 97.4, 60.5, 44.8, 44.4, 43.6, 39.4, 31.4, 31.0, 27.4, 27.2, 24.8, 24.6, 13.5. MS (FAB, 70 eV): *m/z* (relative intensity) 233 (M<sup>+</sup>, 100); HRMS calcd for C<sub>14</sub>H<sub>19</sub>NO<sub>2</sub>: 233.1416, found 233.1420.

**10-(4-(Hexyloxy)phenyl)-10H-phenothiazine-3-carbaldehyde (D-1).** A solution of n-BuLi (6.2 mL, 9.93 mmol, 1.6 M in hexane) was added dropwise to a solution of **C-1** (3.0 g, 6.62 mmol) in THF at –78 °C. The mixture was stirred for 1 h, and dimethyl formamide (DMF; 0.76 mL, 9.93 mmol) was then added to it. Furthermore, the mixture was stirred with a magnetic bar for 6 h, the reaction was quenched by adding water, and the product was extracted using ethyl acetate. The organic layer was dried over anhydrous MgSO<sub>4</sub> and concentrated under reduced pressure to yield the crude product. The product was purified using a silica gel column chromatograph eluted with dichloromethane/hexane (1/1). A light yellow solid (**D-1**) was obtained in a 77% yield (2.06 g, 5.10 mmol).  $\delta_{\text{H}}$  (400 MHz, CDCl<sub>3</sub>) 9.69 (s, 1H), 7.45 (d, 1H, *J* = 1.6 Hz), 7.28 (dd, 1H, *J* = 8.2, 2.0 Hz), 7.27 (d, 2H, *J* = 8.8 Hz), 7.13 (d, 2H, *J* = 8.8 Hz), 6.96 (dd, 1H, *J* = 5.6, 3.6 Hz), 6.84 (dd, 2H, *J* = 5.8, 3.6 Hz), 6.22 (d, 1H, *J* = 8.8 Hz), 6.17–6.19 (m, 1H), 4.05 (t, 2H, *J* = 6.4 Hz), 1.84–1.88 (m, 2H), 1.51–1.55 (m, 2H), 1.38–1.42 (m, 4H), 0.93–0.97 (m, 3H).  $\delta_{\text{C}}$  (100 MHz, CDCl<sub>3</sub>) 189.6, 159.2, 149.5, 142.8, 132.0, 131.6, 130.9, 129.9, 127.3, 127.1, 126.6, 123.5, 120.0, 118.9, 116.7, 116.4, 115.0, 68.4, 31.5, 29.2, 25.7, 22.6, 14.0. MS (FAB, 70 eV): *m/z* (relative intensity) 404 ((M+H)<sup>+</sup>, 100). HRMS calcd for C<sub>25</sub>H<sub>25</sub>NO<sub>2</sub>S: 404.1684, found 404.1694.

**4-(Diphenylamino)benzaldehyde (D-2).** Compound **D-2** was synthesised using a method similar to that of **D-1**, producing a yellow solid in an 85% yield.  $\delta_{\text{H}}$  (400 MHz, CDCl<sub>3</sub>) 9.80 (s, 1H), 7.66 (d, 2H, *J* = 8.6 Hz), 7.31–7.35 (m, 4H), 7.14–7.18 (m, 6H), 7.01 (d, 2H, *J* = 8.6 Hz).  $\delta_{\text{C}}$  (100 MHz, CDCl<sub>3</sub>) 190.3, 153.3, 146.1, 131.2, 129.6, 129.0, 126.2, 125.0, 119.2. MS (FAB, 70 eV): *m/z* (relative intensity) 273 ((M+H)<sup>+</sup>, 100); HRMS calcd for C<sub>19</sub>H<sub>15</sub>NO: 273.1154, found 273.1160.

**4-(N-(naphthalen-1-yl)-N-phenylamino)benzaldehyde (D-3).** Compound **D-3** was synthesised using a method similar to that of **D-1**, producing a yellow solid in a 70% yield.  $\delta_{\text{H}}$  (500 MHz,  $\text{CDCl}_3$ ) 9.76 (s, 1H), 7.90 (d, 1H,  $J = 8.6$  Hz), 7.89 (d, 1H,  $J = 8.9$  Hz), 7.83 (d, 1H,  $J = 8.2$  Hz), 7.63 (d, 2H,  $J = 8.8$  Hz), 7.46–7.50 (m, 2H), 7.37–7.40 (m, 2H), 7.23–7.30 (m, 4H), 7.10 (t, 2H,  $J = 6.7$  Hz), 6.89 (d, 2H,  $J = 8.8$  Hz).  $\delta_{\text{C}}$  (125 MHz,  $\text{CDCl}_3$ ) 190.3, 153.7, 146.2, 141.8, 135.2, 131.4, 129.6, 128.6, 124.8, 124.7, 123.6, 117.7. MS (FAB, 70 eV):  $m/z$  (relative intensity) 323 ( $(\text{M}+\text{H})^+$ , 100); HRMS calcd for  $\text{C}_{23}\text{H}_{17}\text{NO}$ : 323.1310, found 323.1313.

**4-(Bis(4-(hexyloxy)phenyl)amino)benzaldehyde (D-4).** Compound **D-4** was synthesised using a method similar to that of **D-1**, producing an orange solid in a 58% yield.  $\delta_{\text{H}}$  (300 MHz,  $\text{CDCl}_3$ ) 9.74 (s, 1H), 7.61 (d, 2H,  $J = 8.88$  Hz), 7.11 (d, 4H,  $J = 8.88$  Hz), 6.82–6.89 (m, 6H), 3.94 (t, 4H,  $J = 6.48$  Hz), 1.73–1.80 (m, 4H), 1.41–1.48 (m, 4H), 1.31–1.36 (m, 8H), 0.91 (t, 6H,  $J = 7.17$  Hz).  $\delta_{\text{C}}$  (75 MHz,  $\text{CDCl}_3$ ) 190.2, 156.8, 154.0, 138.5, 131.3, 127.9, 127.5, 116.6, 115.5, 68.2, 31.5, 29.2, 25.7, 22.5, 14.0. MS (FAB, 70 eV):  $m/z$  (relative intensity) 473 ( $\text{M}^+$ , 100); HRMS calcd for  $\text{C}_{31}\text{H}_{39}\text{NO}_3$ : 473.2924, found 473.2921.

**Ethyl (E,Z)-2-cyano-2-(3-((E)-2-(10-(4-(hexyloxy)phenyl)-10H-phenothiazin-3-yl)vinyl)-5,5-dimethyl-cyclohex-2-en-1-ylidene)acetate (E-1).** Compounds **D-1** (5 g, 12.4 mmol) and **B** (3g, 9.3 mmol) were mixed in a three-necked flask under a nitrogen atmosphere and stirred in dry ACN for a while. Furthermore, piperidine (1.1 mL, 10.2 mmol) was added, and the mixture was heated at 90 °C overnight. The product was extracted using dichloromethane (DCM), and the organic layer was dried over anhydrous  $\text{MgSO}_4$  and evaporated under vacuum. The product was purified using a silica gel column chromatograph, with ethyl acetate/hexane (1/15) as the eluent. A dark red solid (**E-1**) was obtained in a 67% yield.  $\delta_{\text{H}}$  (400 MHz,  $\text{CDCl}_3$ ) 7.89 (s, 1H), 7.27–7.30 (m, 2H), 7.12–7.14 (m, 3H), 6.74–7.00 (m, 6H), 6.13–6.19 (m, 2H), 4.26–4.34 (m, 2H), 6.13–6.19 (m, 2H), 4.06 (t, 2H,  $J = 6.52$  Hz), 2.98 (s, 1H), 2.63 (s, 1H), 2.38 (s, 1H), 2.37 (s, 1H), 1.85–1.88 (m, 2H), 1.52–1.55 (m, 2H), 1.35–1.42 (m, 6H), 1.07 (s, 3H), 1.04 (s, 3H), 0.95 (t, 3H,  $J = 7.04$  Hz).  $\delta_{\text{C}}$  (100 MHz,  $\text{CDCl}_3$ ) 166.5, 164.9, 163.2, 162.8, 159.0, 152.3, 151.9, 145.3, 145.2, 143.7, 133.6, 132.5, 131.9, 130.4, 130.3, 128.5, 127.8, 126.9, 126.5, 126.4, 126.3, 125.9, 125.1, 124.9, 123.8, 122.6, 120.0, 119.0, 117.4, 116.6, 116.5, 115.9, 115.6, 99.0, 98.3, 68.3, 61.4, 61.3, 44.7, 40.8, 39.2, 38.8, 31.8, 31.5, 31.3, 29.2, 28.3, 28.1, 25.7, 22.6, 14.1, 14.0. MS (FAB, 70 eV):  $m/z$  (relative intensity) 618 ( $\text{M}^+$ , 100); HRMS calcd for  $\text{C}_{39}\text{H}_{42}\text{N}_2\text{O}_3\text{S}$ : 618.2911, found 618.2897.

**Ethyl (E,Z)-2-cyano-2-(3-((E)-4-(diphenylamino)styryl)-5,5-dimethylcyclohex-2-en-1-ylidene)acetate (E-2).** Compound **E-2** was synthesised using a method similar to that of **E-1**, producing a red solid in a 95% yield.  $\delta_{\text{H}}$  (500 MHz,  $\text{CDCl}_3$ ) 7.85 (s, 1H), 7.30 (d, 1H,  $J = 8.20$  Hz),

7.28 (d, 1H,  $J = 8.35$  Hz), 7.21–7.25 (m, 4H), 7.07 (d, 4H,  $J = 7.45$  Hz), 7.03 (t, 2H,  $J = 7.35$  Hz), 6.97 (d, 1H,  $J = 8.15$  Hz), 6.96 (d, 1H,  $J = 8.35$  Hz), 6.84–6.85 (m, 2H), 4.20–4.26 (m, 2H), 2.93 (s, 1H), 2.58 (s, 1H), 2.36 (s, 1H), 2.34 (s, 1H), 1.29–1.33 (m, 3H), 1.01 (s, 3H), 0.99 (s, 3H).  $\delta_C$  (125 MHz,  $CDCl_3$ ) 166.7, 165.0, 163.3, 162.8, 152.6, 152.2, 148.9, 148.8, 147.0, 134.7, 134.6, 129.5, 129.4, 129.2, 128.4, 128.3, 127.8, 125.7, 125.1, 123.7, 123.6, 122.2, 117.5, 116.7, 98.8, 98.1, 61.4, 61.3, 44.7, 40.9, 39.2, 38.8, 31.8, 31.4, 28.3, 28.1, 14.1. MS (FAB, 70 eV):  $m/z$  (relative intensity) 488 ( $M^+$ , 100); HRMS calcd for  $C_{33}H_{32}N_2O_2$ : 488.2464, found 488.2466.

**(Ethyl (*E,Z*)-2-cyano-2-(5,5-dimethyl-3-((*E*)-4-(naphthalen-1-yl(phenyl)amino)styryl)cyclohex-2-en-1-ylidene)acetate (E-3).** Compound **E-3** was synthesised using a method similar to that of **E-1**, producing a red solid in a 95% yield.  $\delta_H$  (500 MHz,  $CDCl_3$ ) 7.90 (s, 1H), 7.88 (d, 2H,  $J = 7.40$  Hz), 7.80 (d, 1H,  $J = 8.25$  Hz), 7.49 (d, 1H,  $J = 8.0$  Hz), 7.46 (d, 1H,  $J = 8.50$  Hz), 7.33–7.38 (m, 2H), 7.22–7.30 (m, 4H), 7.12 (d, 2H,  $J = 6.35$  Hz), 7.01 (t, 1H,  $J = 7.30$  Hz), 4.25–4.28 (m, 2H), 2.96 (s, 1H), 2.61 (s, 1H), 2.38 (s, 1H), 2.37 (s, 1H), 1.33–1.36 (m, 3H), 1.04 (s, 3H), 1.02 (s, 3H).  $\delta_C$  (125 MHz,  $CDCl_3$ ) 166.9, 165.2, 163.5, 163.0, 152.9, 152.5, 149.7, 149.6, 147.5, 142.8, 135.4, 135.0, 134.9, 131.2, 129.4, 129.3, 128.4, 128.8, 128.7, 128.6, 128.5, 128.2, 127.6, 127.5, 127.1, 126.8, 126.5, 126.4, 125.7, 124.1, 123.6, 123.4, 123.2, 120.4, 117.7, 117.0, 98.8, 98.1, 61.5, 61.4, 44.9, 41.0, 39.4, 39.0, 31.9, 31.5, 28.5, 28.3, 14.3. MS (FAB, 70 eV):  $m/z$  (relative intensity) 538 ( $M^+$ , 100); HRMS calcd for  $C_{37}H_{34}N_2O_2$ : 538.2620, found 538.2621.

**Ethyl(*E,Z*)-2-(3-((*E*)-4-(bis(4-(hexyloxy)phenyl)amino)styryl)-5,5-dimethylcyclohex-2-en-1-ylidene)-2-cyanoacetate (E-4).** Compound **E-4** was synthesised using a method similar to that of **E-1**, producing an orange solid in an 82% yield.  $\delta_H$  (400 MHz,  $CDCl_3$ ) 7.91 (s, 0.5H), 7.30 (t, 2H,  $J = 4.38$  Hz), 7.06–7.09 (m, 4H), 6.85–6.90 (m, 8.5H), 4.27–4.31 (m, 2H), 3.94–3.97 (m, 4H), 2.99 (s, 1H), 2.64 (s, 1H), 2.42 (s, 1H), 2.40 (s, 1H), 1.76–1.81 (m, 4H), 1.46–1.49 (m, 4H), 1.36–1.39 (m, 11H), 1.05 (s, 3H), 1.07 (s, 3H), 0.91–0.95 (m, 6H).  $\delta_C$  (100 MHz,  $CDCl_3$ ) 166.8, 165.1, 163.4, 163.0, 156.1, 153.1, 152.7, 149.9, 149.9, 139.7, 135.2, 135.1, 128.4, 128.3, 127.6, 127.5, 127.4, 127.2, 126.7, 125.2, 132.2, 119.1, 115.4, 98.2, 97.5, 68.2, 61.3, 61.2, 44.7, 40.9, 39.3, 38.9, 31.8, 31.6, 31.4, 29.3, 28.3, 28.1, 25.7, 22.6, 14.2, 14.0. MS (FAB, 70 eV):  $m/z$  (relative intensity) 688 ( $M^+$ , 100); HRMS calcd for  $C_{45}H_{56}N_2O_4$ : 688.4233, found 688.4233.

## 2. $^1\text{H}$ and $^{13}\text{C}$ NMR spectra

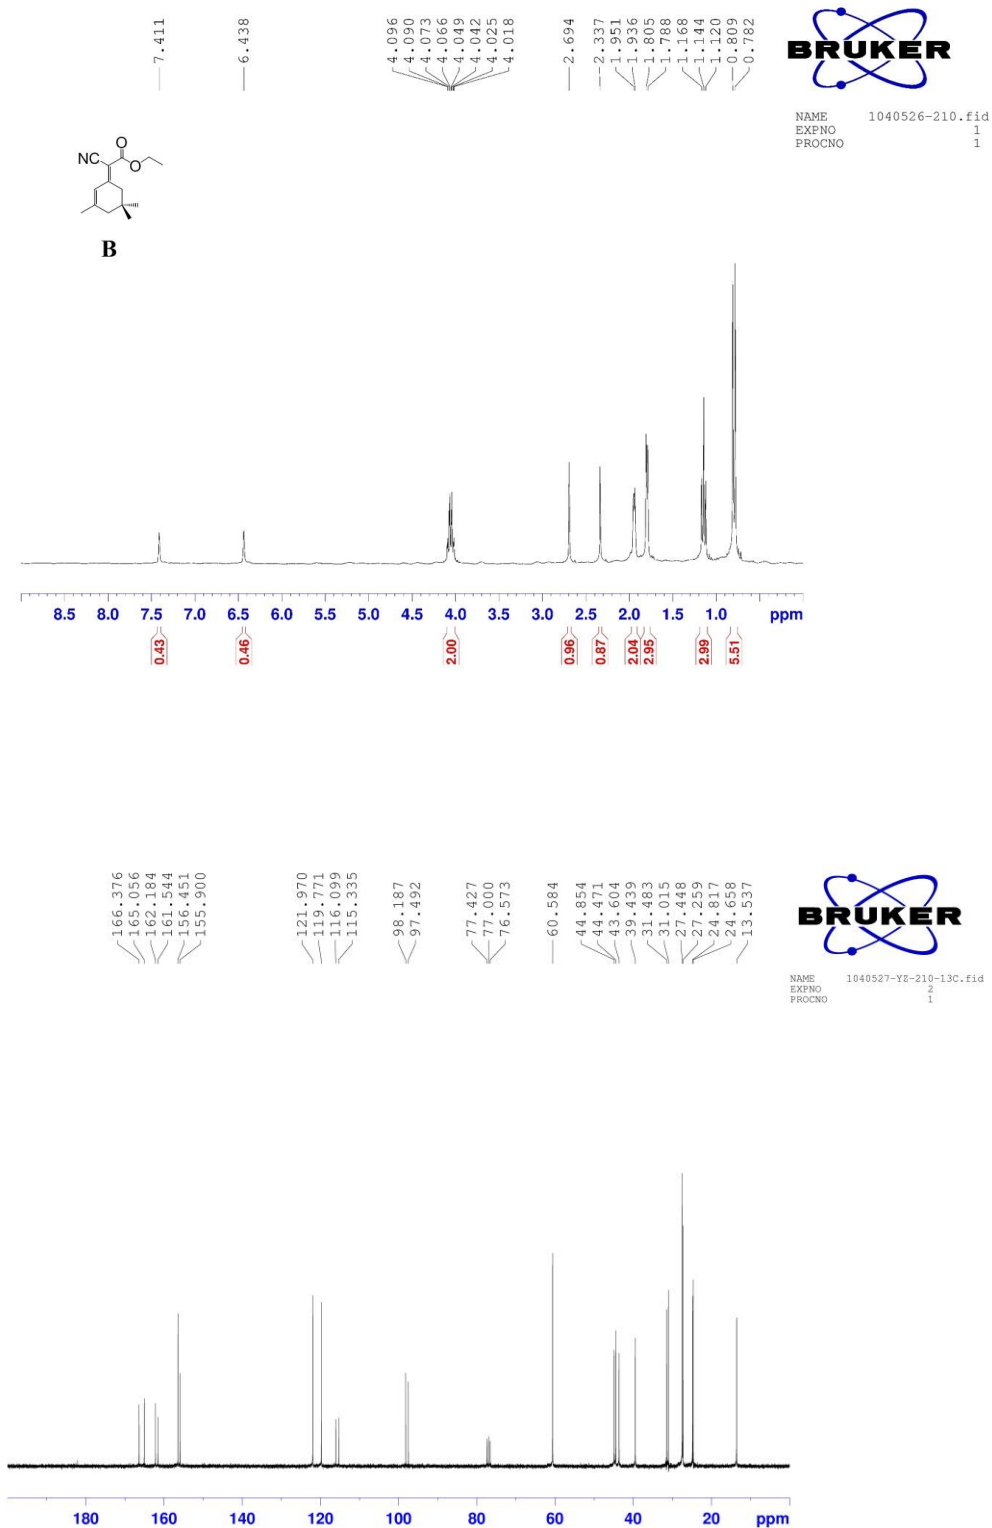

**Fig. S1.**  $^1\text{H}$  NMR (upper) and  $^{13}\text{C}$  NMR (lower) spectra of **B** in CDCl<sub>3</sub>.

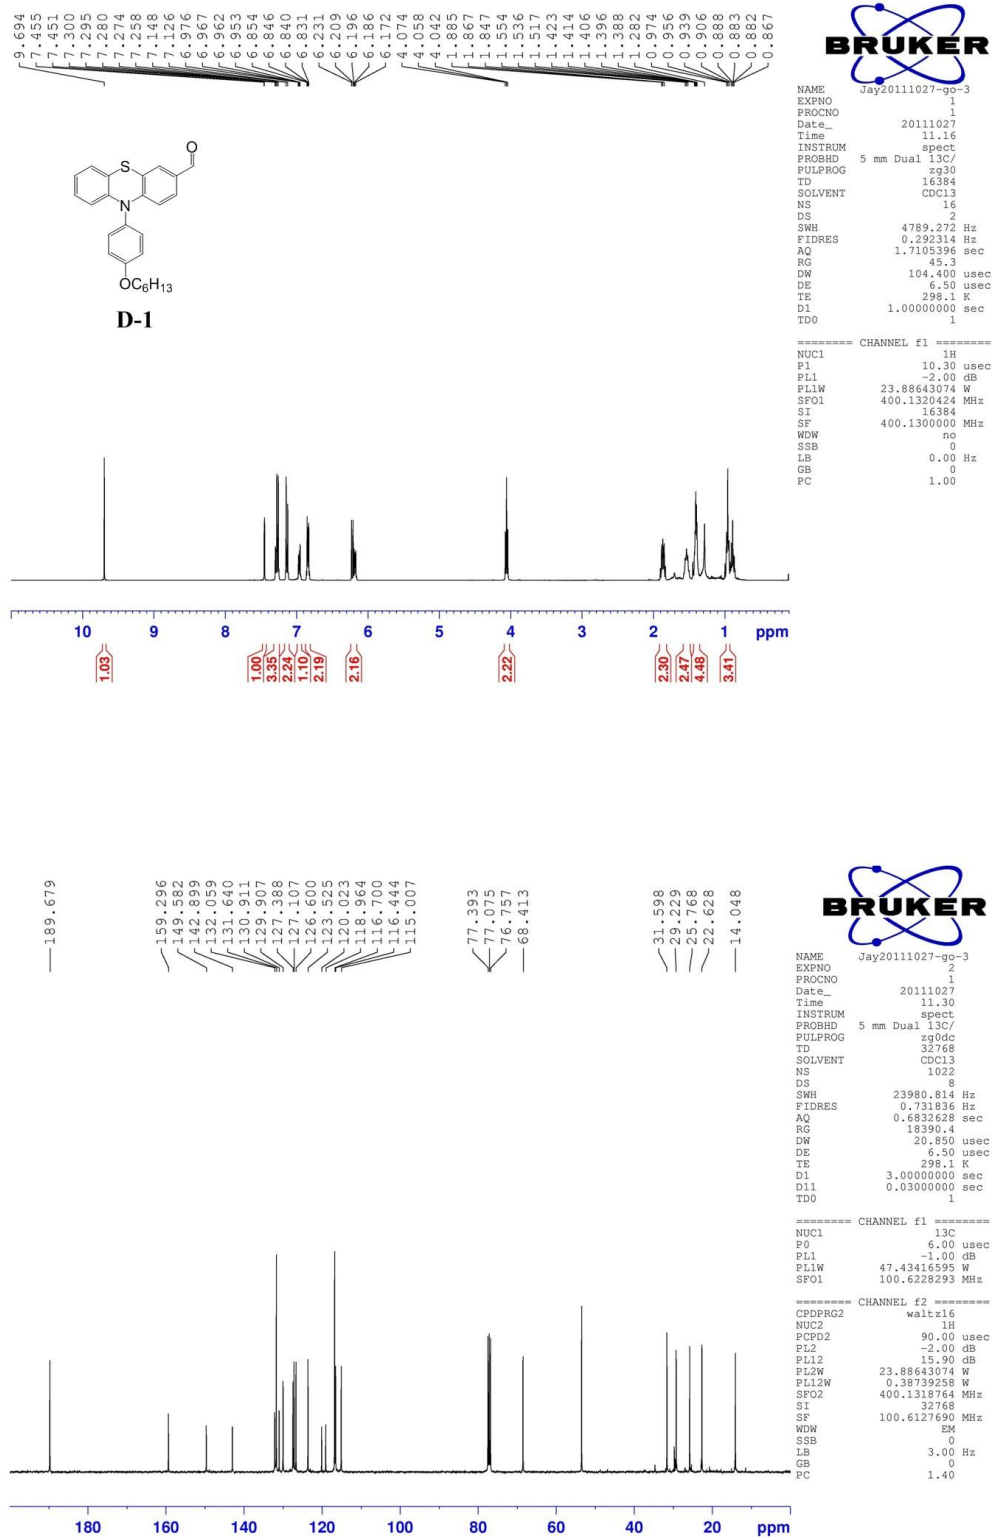

**Fig. S2.** <sup>1</sup>H NMR (upper) and <sup>13</sup>C NMR (lower) spectra of **D-1** in CDCl<sub>3</sub>.

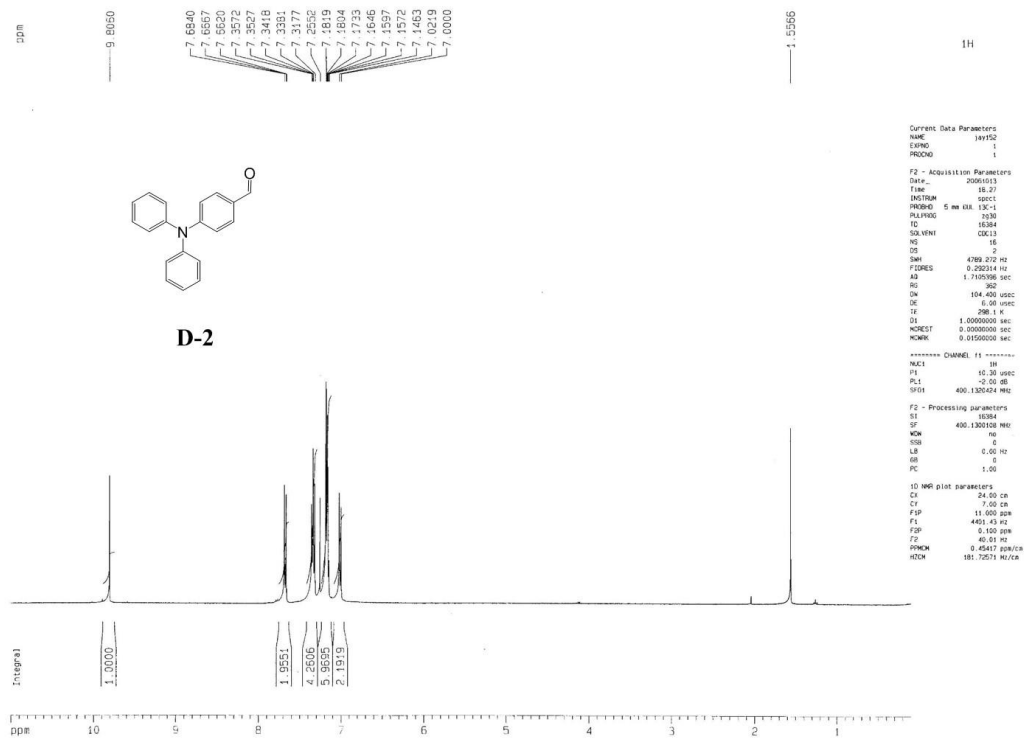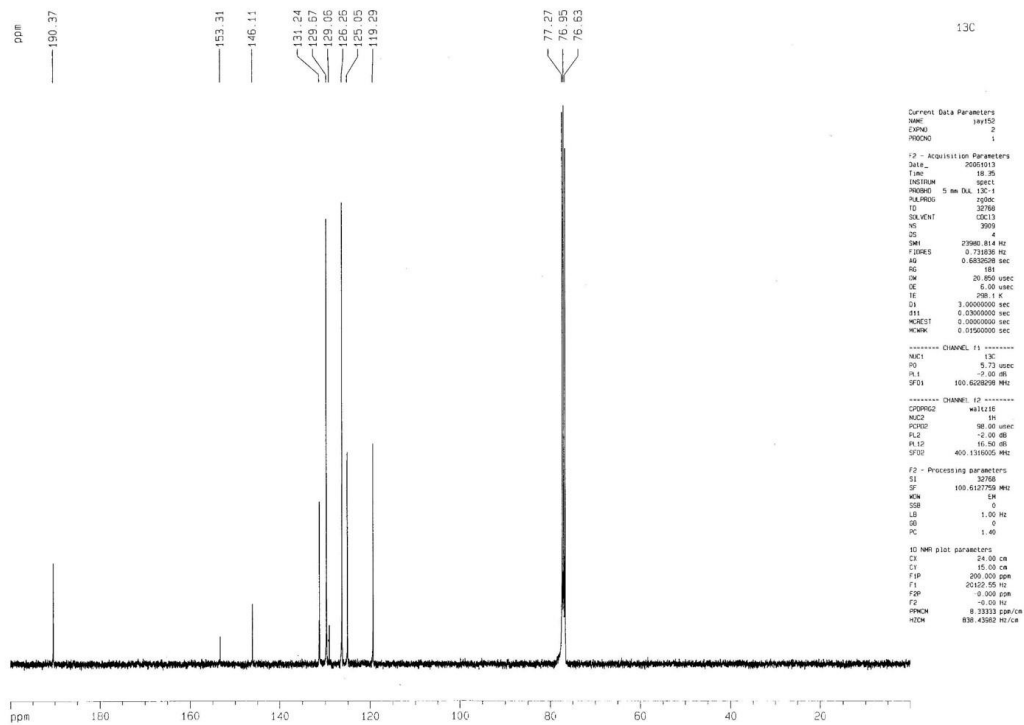

Fig. S3. <sup>1</sup>H NMR (upper) and <sup>13</sup>C NMR (lower) spectra of D-2 in CDCl<sub>3</sub>.

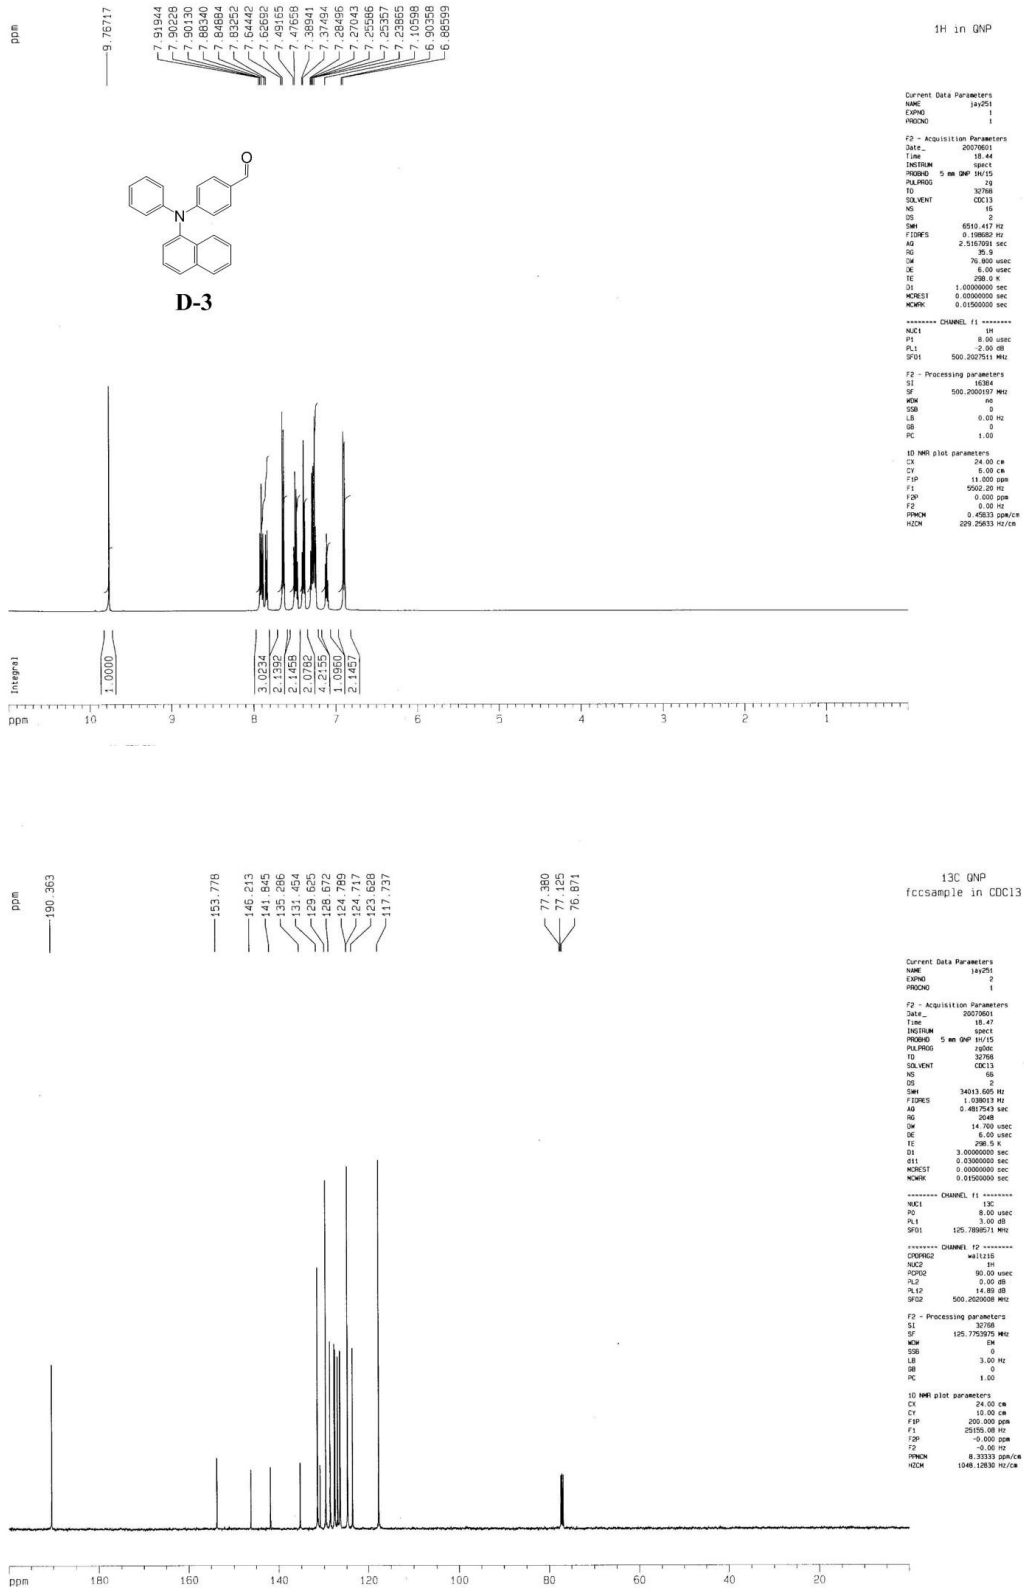

**Fig. S4.** <sup>1</sup>H NMR (upper) and <sup>13</sup>C NMR (lower) spectra of **D-3** in CDCl<sub>3</sub>.



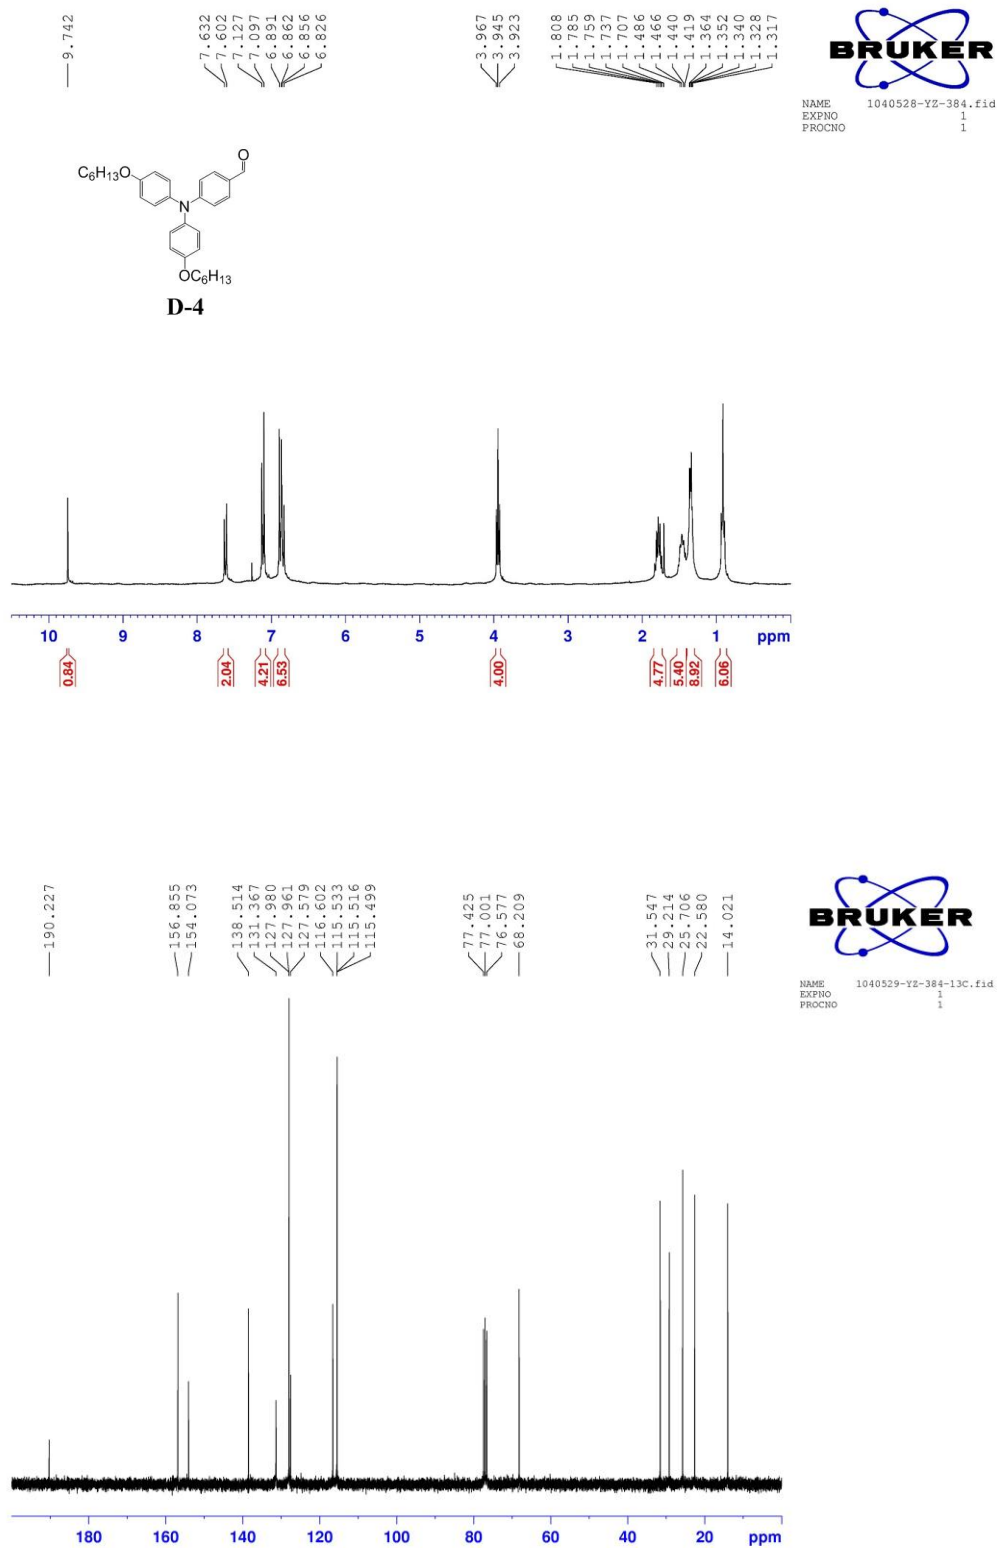

**Fig. S5.** <sup>1</sup>H NMR (upper) and <sup>13</sup>C NMR (lower) spectra of **D-4** in CDCl<sub>3</sub>.

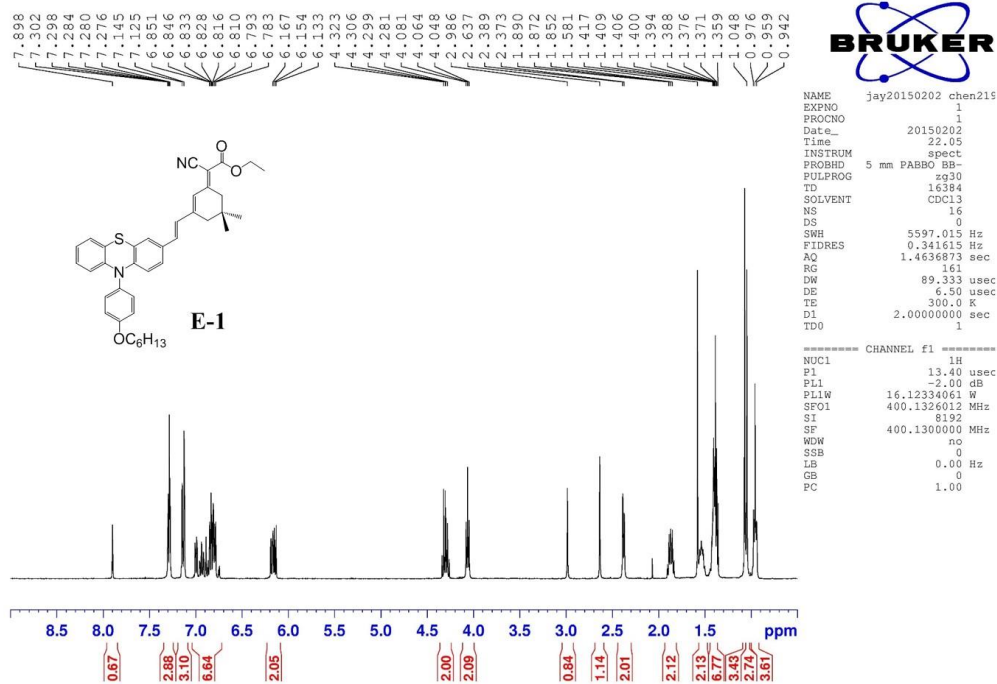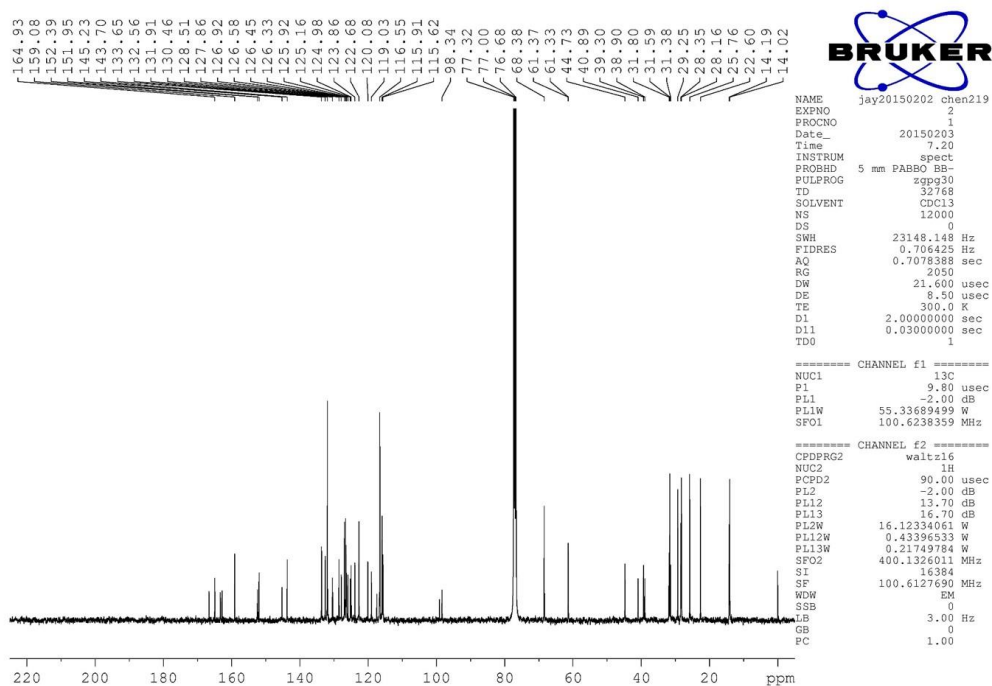

Fig. S6. <sup>1</sup>H NMR (upper) and <sup>13</sup>C NMR (lower) spectra of E-1 in CDCl<sub>3</sub>.

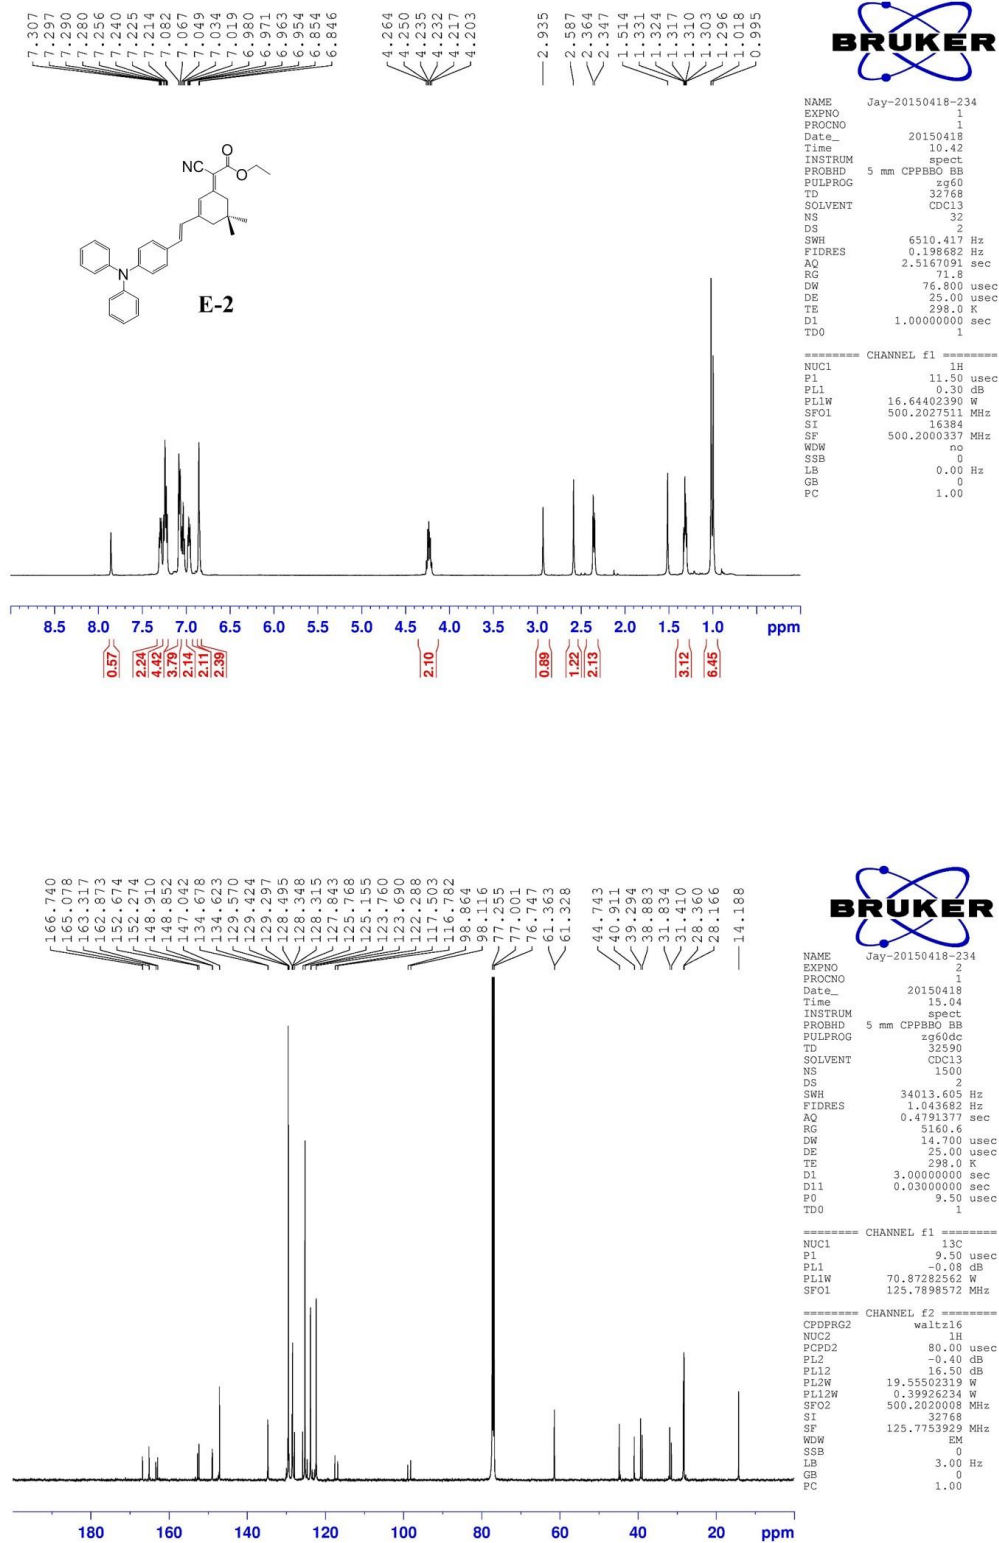

**Fig. S7.** <sup>1</sup>H NMR (upper) and <sup>13</sup>C NMR (lower) spectra of **E-2** in CDCl<sub>3</sub>.

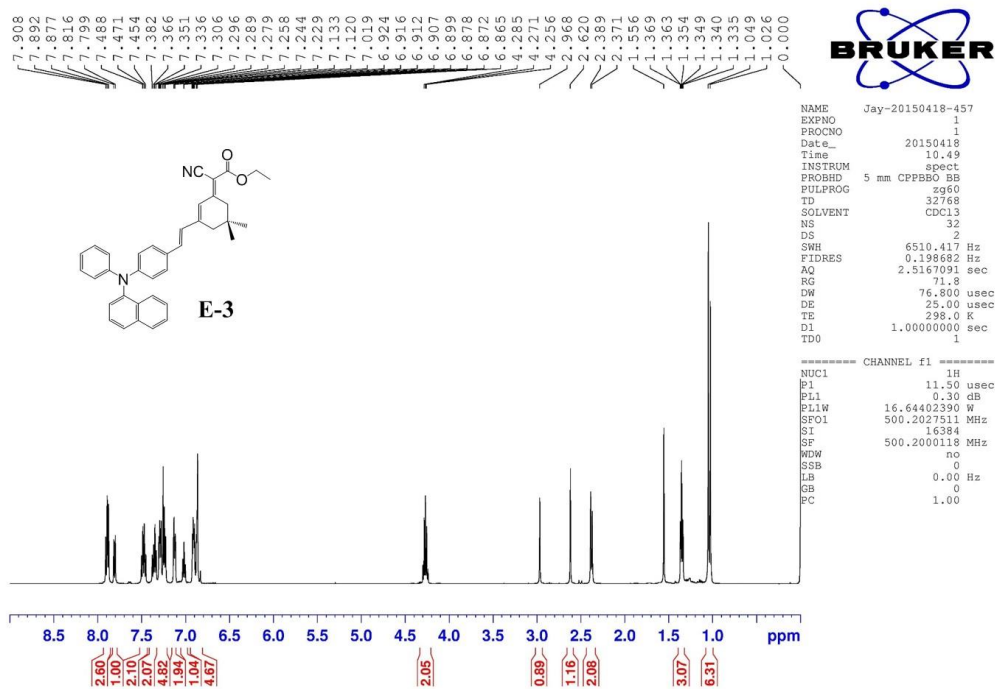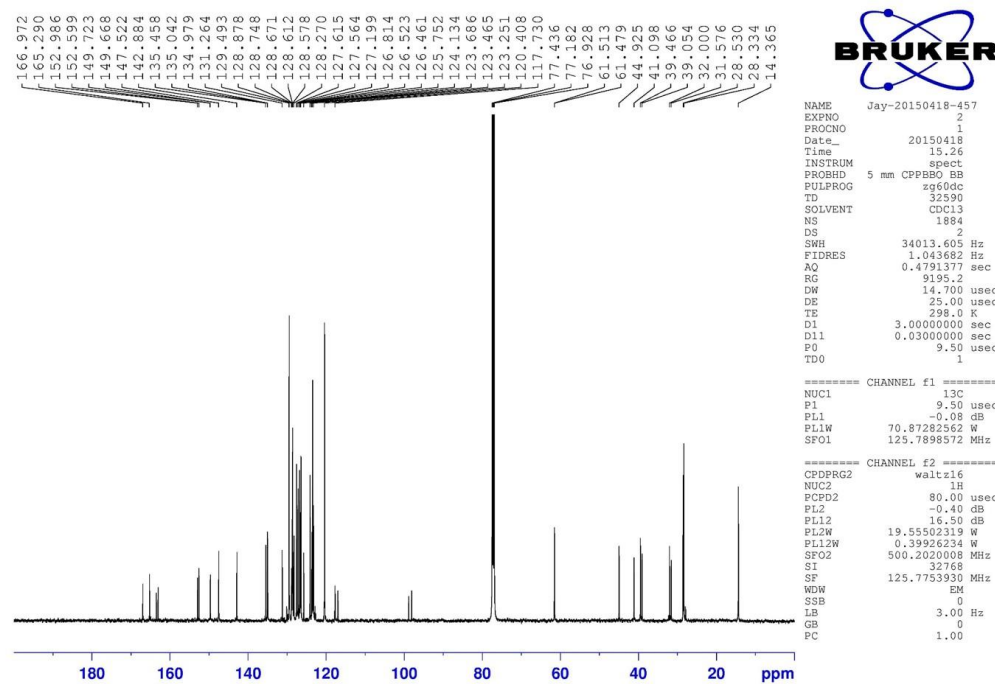

Fig. S8. <sup>1</sup>H NMR (upper) and <sup>13</sup>C NMR (lower) spectra of E-3 in CDCl<sub>3</sub>.

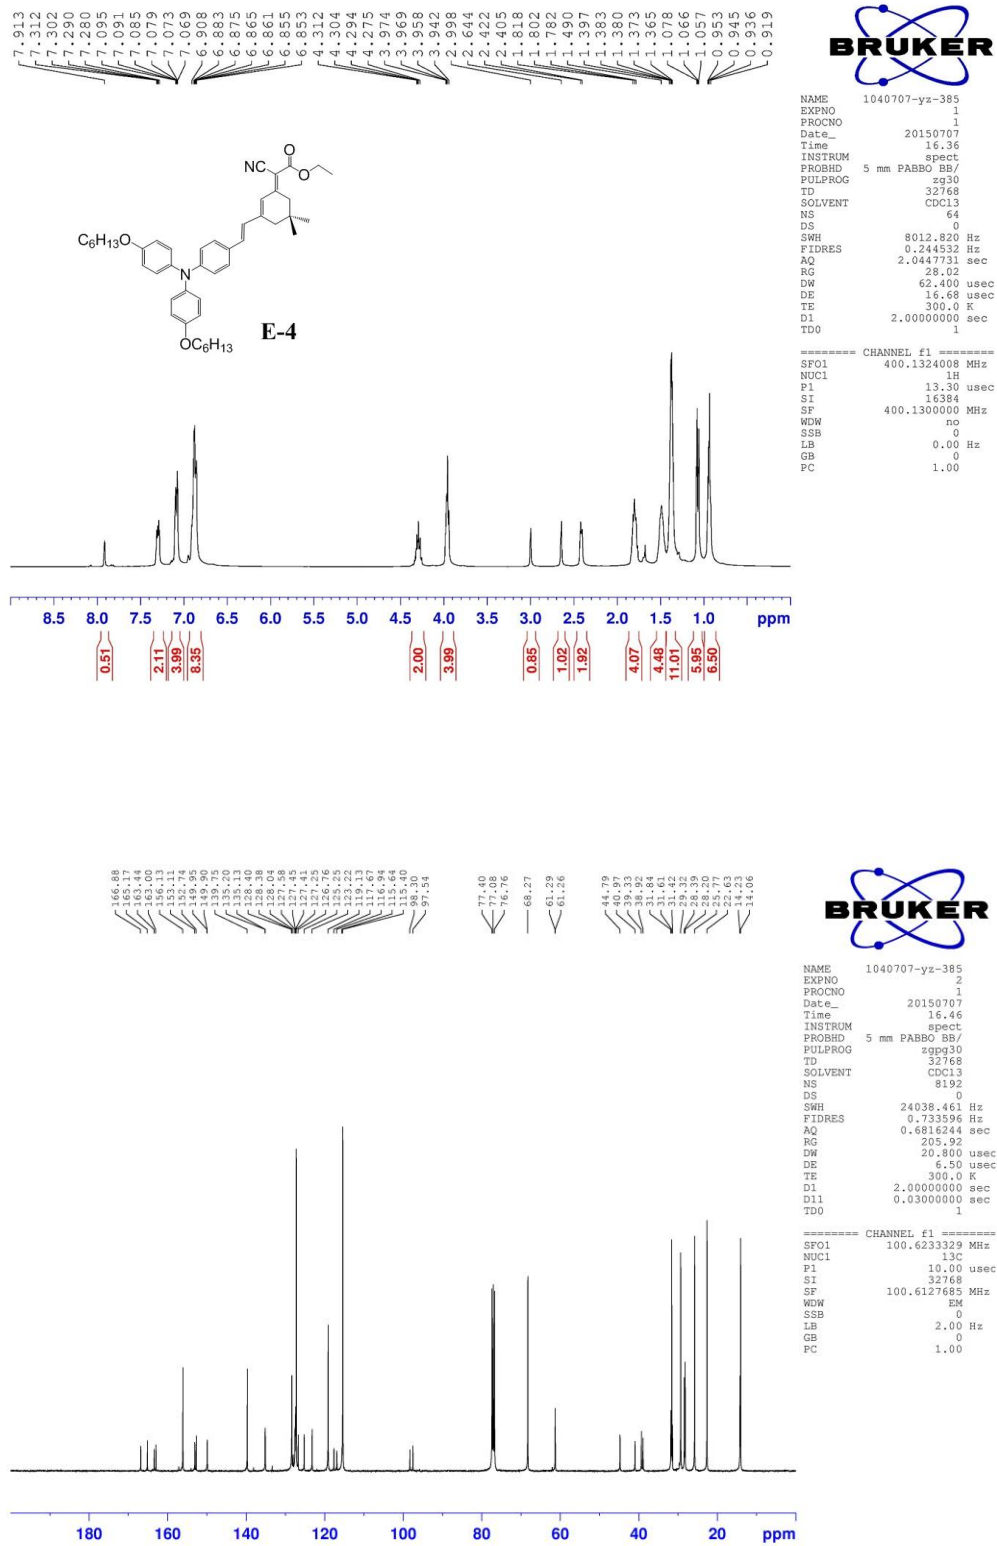

**Fig. S9.** <sup>1</sup>H NMR (upper) and <sup>13</sup>C NMR (lower) spectra of **E-4** in CDCl<sub>3</sub>.

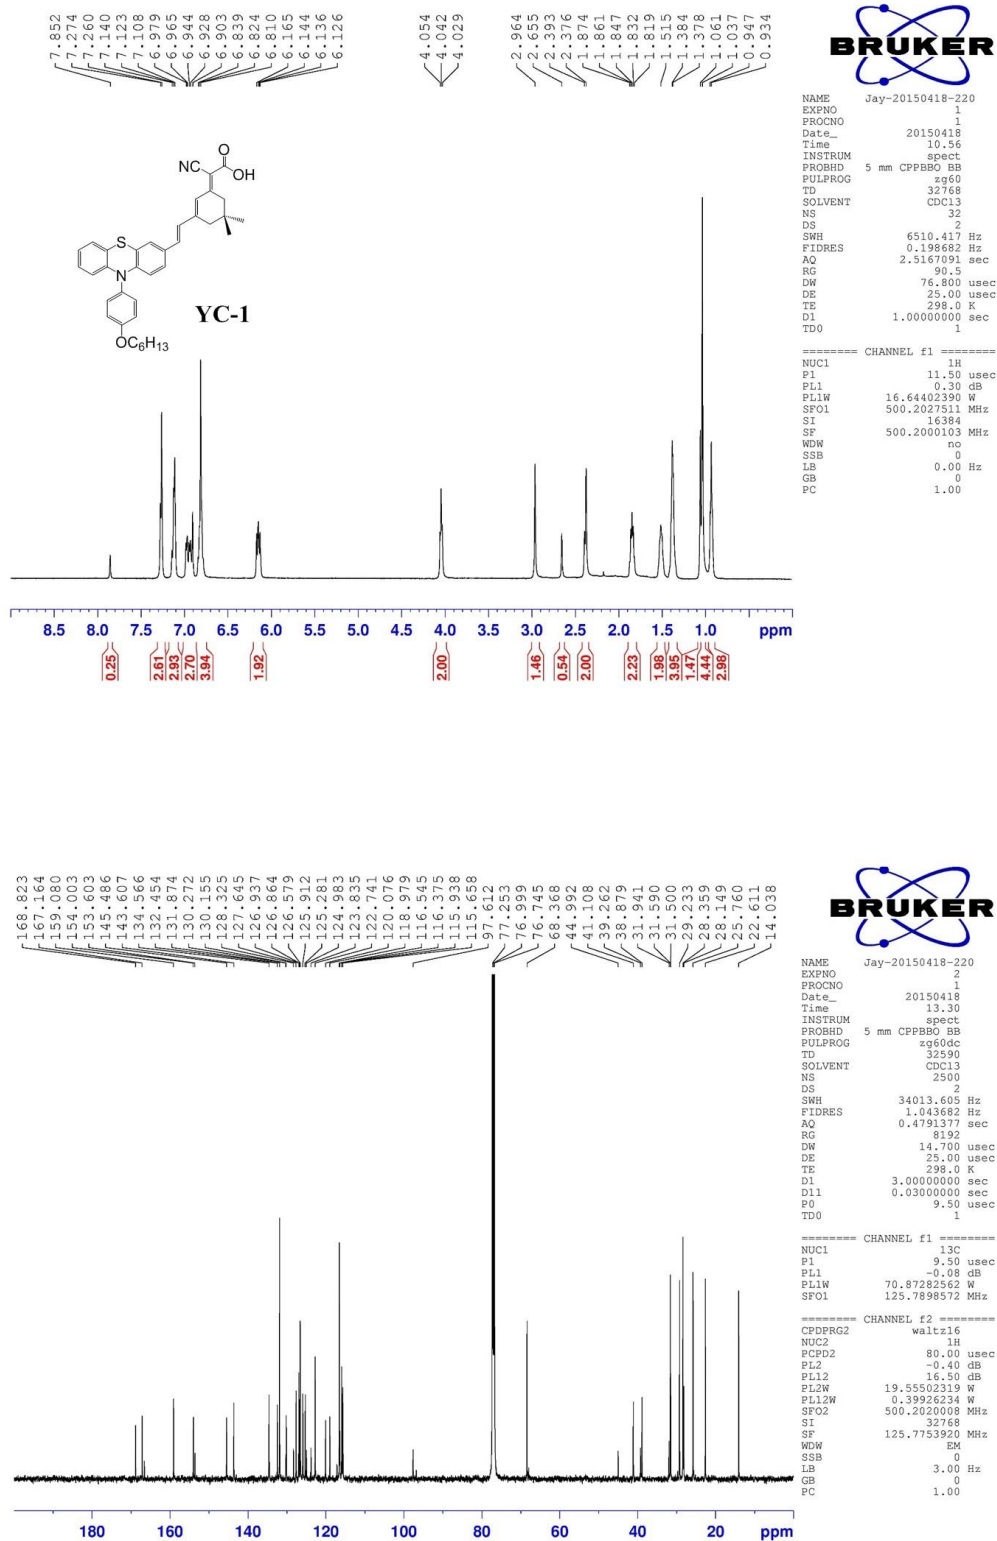

**Fig. S10.** <sup>1</sup>H NMR (upper) and <sup>13</sup>C NMR (lower) spectra of YC-1 in CDCl<sub>3</sub>.

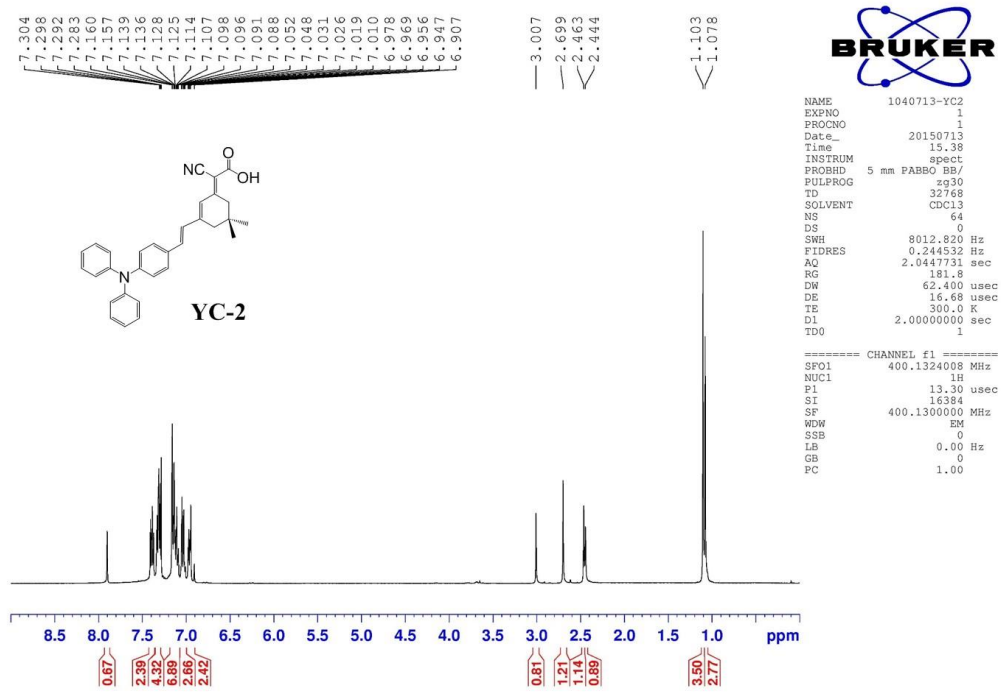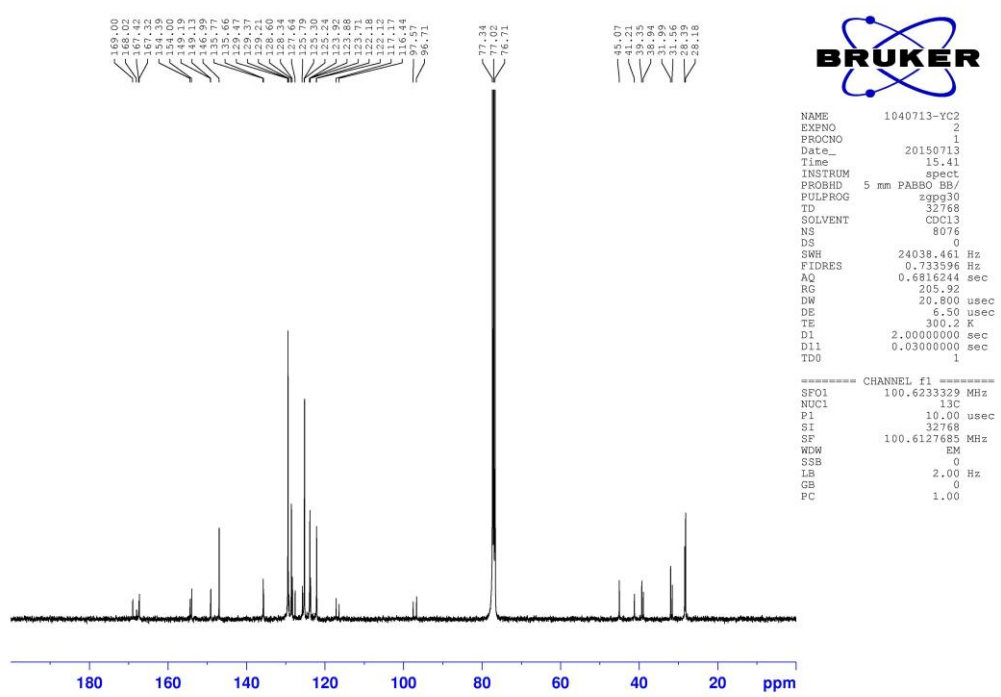

**Fig. S11.** <sup>1</sup>H NMR (upper) and <sup>13</sup>C NMR (lower) spectra of YC-2 in CDCl<sub>3</sub>.

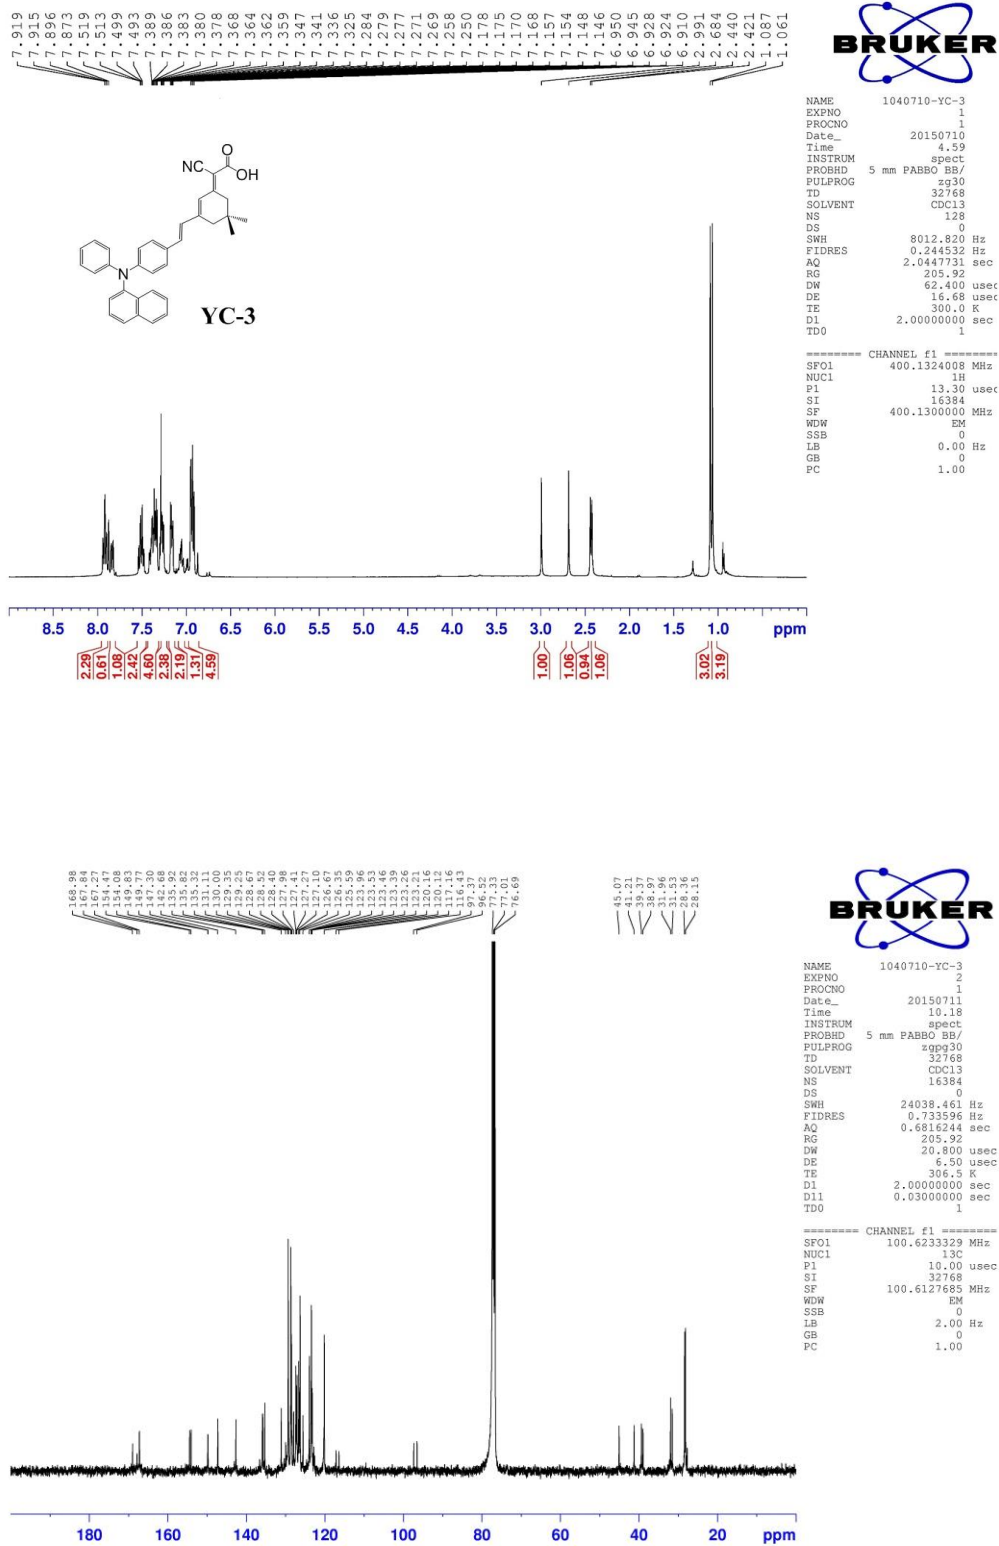

Fig. S12. <sup>1</sup>H NMR (upper) and <sup>13</sup>C NMR (lower) spectra of YC-3 in CDCl<sub>3</sub>.



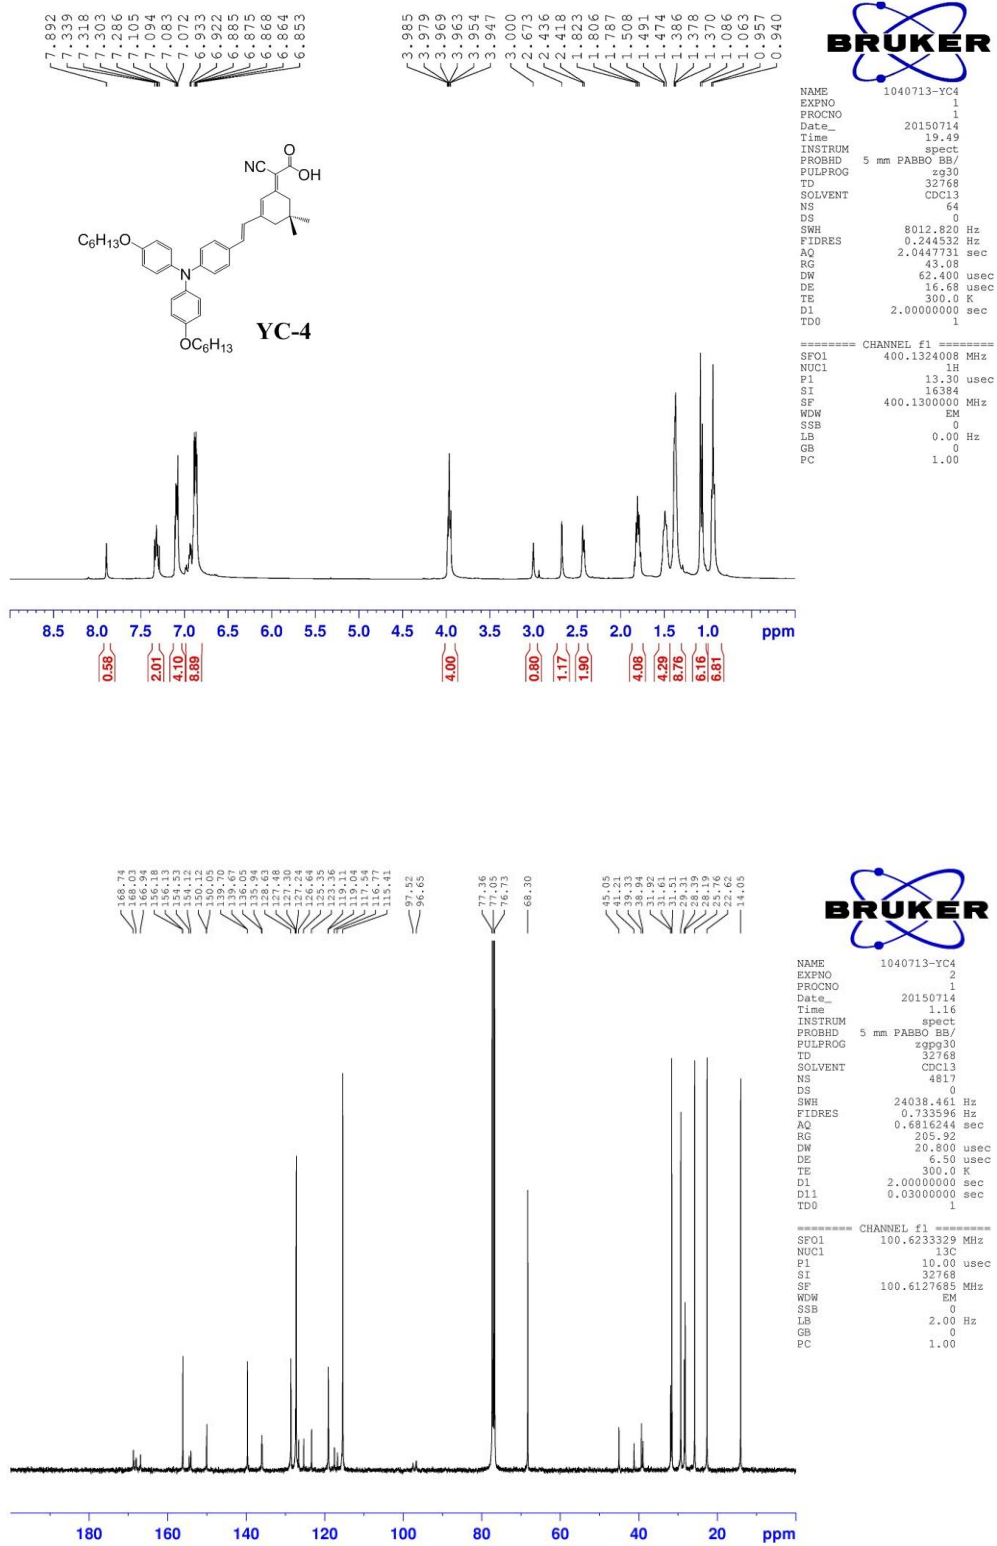

**BRUKER**

180 160 140 120 100 80 60 40 20 ppm

**Fig. S13.**  $^1\text{H}$  NMR (upper) and  $^{13}\text{C}$  NMR (lower) spectra of YC-4 in  $\text{CDCl}_3$ .

### 3. UV/Vis spectra

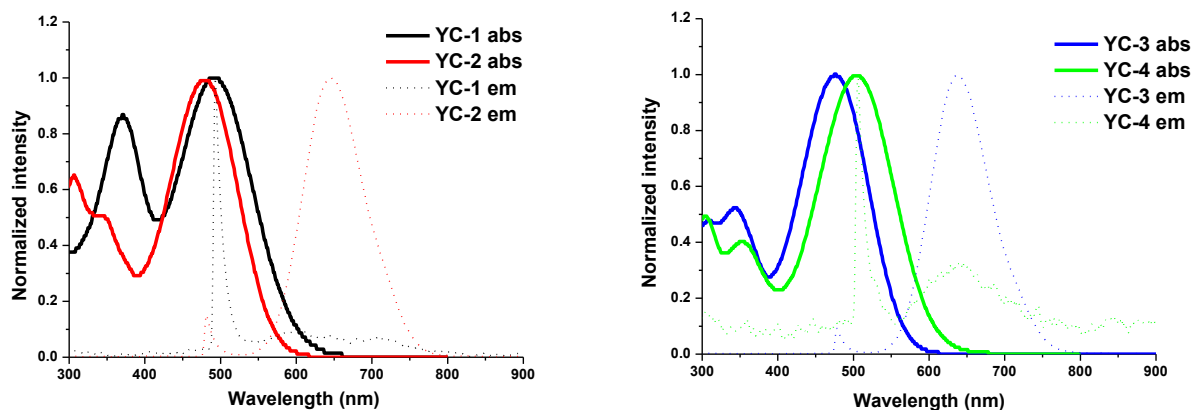

**Fig. S14.** The absorption and emission spectra of YC-series organic dyes in  $\text{CH}_2\text{Cl}_2$ .

### 4. Theoretical calculation

**Table S1.** Calculated Low-Lying Transition for dyes.

| dye  | state | excitation <sup>a</sup> | $\lambda_{\text{cal}}$<br>(eV, nm) | $f^b$<br>B3LYP/631G* | Dipole moment (D) |
|------|-------|-------------------------|------------------------------------|----------------------|-------------------|
| YC-1 | S1    | 96.21% H→L              | <b>2.30(538)</b>                   | <b>0.6122</b>        | <b>12.8343</b>    |
|      | S2    | 84.82% H-1→L            | <b>3.12(397)</b>                   | <b>0.8568</b>        |                   |
|      | S3    | 83.44% H-2→L            | <b>3.52 (352)</b>                  | <b>0.1828</b>        |                   |
| YC-2 | S1    | 98.16% H→L              | <b>2.41(512)</b>                   | <b>1.0267</b>        | <b>9.2625</b>     |
|      | S2    | 89.88% H-1→L            | <b>3.39(365)</b>                   | <b>0.7681</b>        |                   |
|      | S3    | 54.37% H→L+2            | <b>3.81(325)</b>                   | <b>0.0109</b>        |                   |
| YC-3 | S1    | 97.69% H→L              | <b>2.45(505)</b>                   | <b>1.1211</b>        | <b>9.1517</b>     |
|      | S2    | 81.12% H→L+1            | <b>3.20(387)</b>                   | <b>0.0856</b>        |                   |
|      | S3    | 52.53% H-1→L            | <b>3.33(371)</b>                   | <b>0.3573</b>        |                   |
| YC-4 | S1    | 98.66% H→L              | <b>2.28(542)</b>                   | <b>1.1391</b>        | <b>11.9272</b>    |
|      | S2    | 91.35% H-1→L            | <b>3.26(379)</b>                   | <b>0.8260</b>        |                   |
|      | S3    | 96.00% H-2→L            | <b>3.61(343)</b>                   | <b>0.0094</b>        |                   |

<sup>a</sup>H=HOMO, L=LUMO, H+1=HOMO+1, L+1=LUMO+1, and L+2=LUMO+2. <sup>b</sup>Oscillator strengths.

**Table S2.** Difference of Mulliken charges between ground state ( $S_0$ ) and excited state ( $S_1$ ), estimated by time dependent DFT/B3LYP model.

| dye  | state     | <b>D</b> | <b>B</b> | <b>A</b> |
|------|-----------|----------|----------|----------|
| YC-1 | $S_1-S_0$ | 0.72242  | -0.50128 | -0.22114 |
| YC-2 | $S_1-S_0$ | 0.66009  | -0.45257 | -0.20752 |
| YC-3 | $S_1-S_0$ | 0.63324  | -0.43408 | -0.19916 |
| YC-4 | $S_1-S_0$ | 0.68887  | -0.47468 | -0.21419 |

Difference of Mulliken charge between ground state and excited state.

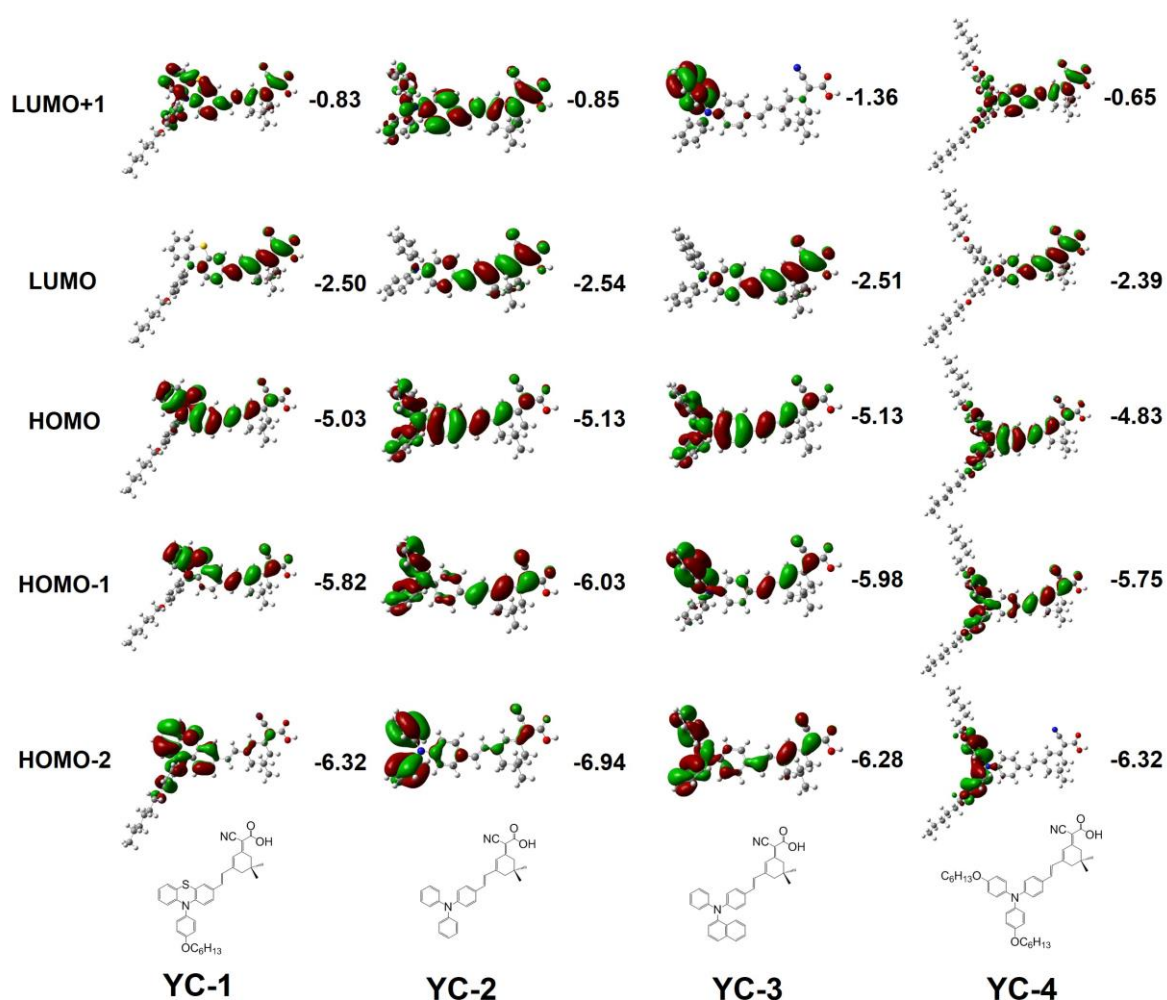

**Fig. S15.** Computed HOMO and LUMO orbitals of organic dyes.

## 5. CV spectra and HOMO-LUMO level

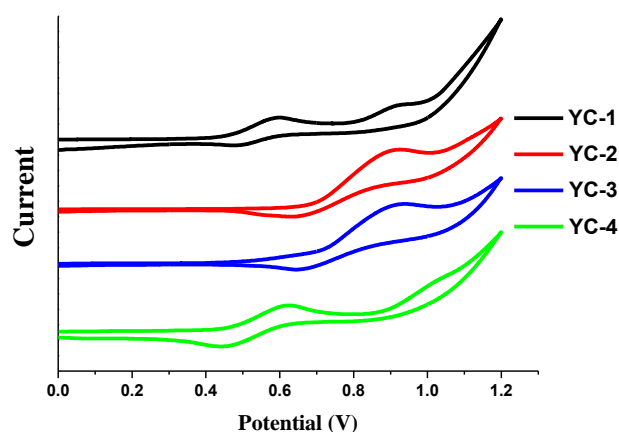

**Fig. S16.** Oxidative voltammograms of YC-series organic dyes in CH<sub>2</sub>Cl<sub>2</sub>.

## 6. Different solvent system in DSSCs performance

**Table S3.** Photovoltaic parameters of Devices made YC-1, YC-2, YC-3 and YC-4 in THF and CH<sub>2</sub>Cl<sub>2</sub>.

| Solvent system                  | dye  | $J_{sc}$ (mA·cm <sup>-2</sup> ) | $V_{oc}$ (V) | FF   | $\eta^a$ (%) |
|---------------------------------|------|---------------------------------|--------------|------|--------------|
| THF                             | YC-1 | 10.47                           | 0.67         | 0.54 | 4.50         |
|                                 | YC-2 | 9.65                            | 0.63         | 0.60 | 3.61         |
|                                 | YC-3 | 10.63                           | 0.63         | 0.60 | 3.99         |
|                                 | YC-4 | 11.14                           | 0.65         | 0.55 | 3.97         |
| CH <sub>2</sub> Cl <sub>2</sub> | YC-1 | 14.86                           | 0.67         | 0.62 | 6.18         |
|                                 | YC-2 | 12.18                           | 0.64         | 0.62 | 4.92         |
|                                 | YC-3 | 12.43                           | 0.65         | 0.63 | 5.08         |
|                                 | YC-4 | 13.44                           | 0.66         | 0.60 | 5.37         |
| MeCN/ <i>t</i> -BuOH(1/1)       | N719 | 15.94                           | 0.73         | 0.60 | 7.02         |

$J_{sc}$ : short-circuit photocurrent density;  $V_{oc}$ : open-circuit photovoltage; FF: fill factor;  $\eta$ : total power conversion efficiency. <sup>a</sup> Performance of DSSC measured in a 0.25 cm<sup>2</sup> working area on an FTO (7Ω/square) substrate. Electrolyte 1 (E1): LiI (0.5M), I<sub>2</sub> (0.05M), and TBP (0.5M) in MeCN.

## 7. Dyes loading amount

**Table S4** Dyes loading amount on TiO<sub>2</sub> surface using **YC-1-4** with and without deoxycholic acid

| dye <sup>a</sup> | DCA (mM) | Loading amount (10 <sup>-7</sup> mol/cm <sup>2</sup> ) |
|------------------|----------|--------------------------------------------------------|
| <b>YC-1</b>      | 0        | 13.4                                                   |
|                  | 10       | 10.2                                                   |
| <b>YC-2</b>      | 0        | 6.3                                                    |
|                  | 10       | 9.0                                                    |
| <b>YC-3</b>      | 0        | 8.3                                                    |
|                  | 10       | 8.7                                                    |
| <b>YC-4</b>      | 0        | 11.8                                                   |
|                  | 10       | 10.1                                                   |

<sup>a</sup> Concentration of dye is 3 × 10<sup>-4</sup> M in CH<sub>2</sub>Cl<sub>2</sub>.
